# Supplementary material
Source: HighWire-hosted journal article supplement (doi:10.1101/rna.079691.123)
Supplement: Supplemental_Figure_Legends.docx [file Supplemental_Figure_Legends.docx]

**Figure S1:** Complete multiple sequence alignment of A3 proteins from three species from the genus *Trypanosoma*. Refer to the Materials and Methods for gene IDs and alignment details.

**Figure S2: Parasite growth and CC integrity in BF MGA cell lines A**: Native western blots of MGA cell lines after 48 and 96 hours since tetracycline withdrawal. Western blots were probed with the A2 mAb to visualize CCs. **B**: Growth data for BF A3 mutant cell lines carrying the MGA mutation. Blue indicates fewer cells in the –tet sample compared to + tet, whereas orange indicates more cells in the –tet sample.

**Figure S3: RPS12 sequence characteristics from different BF cell lines**. Sequences from each cell line were aligned with each other and fully edited and pre-edited RPS12. Inserted and deleted Us that match the F.E. sequence are indicated in red or by *, respectively. Inserted and deleted Us that do not match the F.E. sequence are also indicated. Junctions in each transcript are underlined. Highlighted regions contain a non-U nucleotide mismatch. Analysis of this data to produce the graphs in Figure 5 is described in detail in the Materials and Methods.

**Figure S4: Potential cognate residues in proteins related to A3 A-E:** Structural overlays of full-length proteins A1, A2, A4-6, MPSS5, MPSS6, and Tb927.10.8220 are shown in yellow with A3 (blue).Residues with at least one characteristic in common with a mutated residue in A3 are shown if applicable. See Table S4 for a complete list. Fig S4A includes a panel showing two Arg residues in A1 that have been previously associated with RNA interactions (Park et al 2012a) overlayed with cognate residues in A3.

**Figure S5**: **Summary of A3 cross-links within CCs** **A**: Summary of the lysine residues in A3 that were involved in cross-links as described by McDermott et al (2016). Cross-linked lysine residues in A3 are indicated in orange. **B-H**: Locations of cross-links shown on structural diagrams (AlphaFold) of A3 and each cross-linked protein.

**Figure S6: Comparison between V5-NTZF and NTZF-myc cell lines.** Denaturing western blot using mAbs to detect four CC proteins (A1, A2, L1, and A3) in exclusively-expressed A3 cell lines with either V5 or myc tags. No A3 protein is observed in the NTZF-myc sample.
