# Supplementary material
Source: HighWire-hosted journal article supplement (doi:10.1101/rna.079691.123)
Supplement: Supplemental_Table_S1.xlsx [file Supplemental_Table_S1.xlsx]

## Sheet: Clones with growth defects
Clone number	Amino acid changes
P1A1	F60L
P1A4	S137L, P263S, Q367L, S371P
P1A8	S137P, F190S
P1A10	K39N, S105A, A220V, H285D, G353S
P1B1	V282G
P1B2	K178E, F181L, Y254H, A273T
P1B3	L66--> STOP, P135Q
P1B4	Q299H
P1B5	D319E, H377Y
P1B7	H204Y
P1B8	K203N, F305S
P1B9	V155D, V272A, F320Y
P1B12	N164I, M250V, N275S, I301N, Y342H
P1C1	G143W, T189I, H199Q, A273V, P325H
P1C2	F60L, N275S, T147A, G304V
P1C3	D271N, D319V, F332S
P1C4	A194T, Y268H
P1C6	F307S
P1C8	S115L, P132T, F136S, I142M, H198L, K374M
P1C9	A37T, G217D, frame-shift beginning at residue 355
P1C10	N290K, (C term unknown after aa 384)
P1C11	Partial sequence only. No mutations of note
P1C12	Q349P, R361G
P1D2	H69N
P1D3	K39E, K79--> STOP, V383A
P1D6	S44A, M71I, F190S, last 4 residues unknown
P1D7	K73E, H128Q, Q225E, G232V
P1D8	P366S, C288Y, partial sequence only
P1D9	T124A, C288Y, P366S
P1D10	F60S, A220V, E281V
P1D12	F60C, N275S
P1E1	G143W, T189I, H199Q, P325H
P1E4	Y35N, V156D, T161N, K188E, V337E
P1F6	K77--> STOP
P1F7	Frameshift after P107
P1F8	P27S, partial sequence only
P1F9	P27S, C186S, L262P
P1F11	H199Y, H377N
P1F12	M32I, L270R, D327E
P1G1	H28Q, T38S, P110A, A249V, W286R
P1G3	F60L, S109T
P1G4	S26P, R61L, E90G, N205I, S371F, H377N
P1G5	Early Frame-shift mutation	*lower confidence. Might also be WT
P1G6	C288Y, D342G, V393A
P1G8	C183Y, D271V, R351S
P1G10	E193V, F305I, E308G	*lower confidence
P1G11	L62F, Q201L, P379T
P1G12	A161V, M250V, H269L, V380D	*lower confidence
P1H1	A161V, M250V, H269L, V380I
P1H2	K179R, V311F
P1H3	F305L, S340R
P1H5	H128N, L196P, T210S, G216V
P1H6	V145A, A283V, T315A
P1H7	T160S, D172G, H198P, E243K, G251R, P379H
P1H8	H69R, L262H, G353D
P1H9	G54C, F60Y, M208T, G217D, N300I, S371C
P1H10	L66S
P1H11	F60L, S110T
P1H12	M81I, E94V, V272G
This table lists the 59 sequenced clones and the substitutions identified in each. Mutations reconstructed as new cell lines with single substitutions are shown in red. Please refer to Materials and Methods for details about how these substitutions were selected.
