# Supplementary material
Source: HighWire-hosted journal article supplement (doi:10.1101/rna.079691.123)
Supplement: Supplemental_Table_S2.xlsx [file Supplemental_Table_S2.xlsx]

## Sheet: Primers
Site-directed mutagenesis primers
Name	Sequence	Description
11515	GCTTGGTCATAATGTGATGATTTGAGGCATTTATAAGACGAAAAGCC	A3 L66S 1
11516	GGCTTTTCGTCTTATAAATGCCTCAAATCATCACATTATGACCAAGC	A3 L66S 2
11517	CCTGCGTGCTTGGTCATAATGCGATGATTTAAGGCATTTATAA	A3 H69R 1
11518	TTATAAATGCCTTAAATCATCGCATTATGACCAAGCACGCAGG	A3 H69R 2
11519	GCTTCGCCTGGTAATAGTGTTGAAGGGCGGC	A3 H199Y 1
11520	GCCGCCCTTCAACACTATTACCAGGCGAAGC	A3 H199Y 2
11521	TGTCGGCATCTCCATGTTATACTTCGCCTGGTAATGGTG	A3 H204Y 1
11522	CACCATTACCAGGCGAAGTATAACATGGAGATGCCGACA	A3 H204Y 2
11523	CGGCGCGACATCACGATGATATTGCGGGGC	A3 L270R 1
11524	GCCCCGCAATATCATCGTGATGTCGCGCCG	A3 L270R 2
11525	TGAGGAGGGTGAAGGGGCTGCACATTGGC	A3 V282G 1
11526	GCCAATGTGCAGCCCCTTCACCCTCCTCA	A3 V282G 2
11527	TAACACAATGATTGACATAACGCCAATGTGCAGCCAC	A3 C288Y 1
11528	GTGGCTGCACATTGGCGTTATGTCAATCATTGTGTTA	A3 C288Y 2
11529	GCCCAACATAACACAATGCTTGACACAACGCCAATGT	A3 N290K 1
11530	ACATTGGCGTTGTGTCAAGCATTGTGTTATGTTGGGC	A3 N290K 2
11531	GAGAACTTTGTCTTCAAATACCAACCCTTCCTGAATGTTTTGC	A3 F305L 1
11532	GCAAAACATTCAGGAAGGGTTGGTATTTGAAGACAAAGTTCTC	A3 F 305L 2
11533	AAACTGGAGAACTTTGTCTTCACTTACAAACCCTTCCTGAATGTTTTGC	A3 F307S 1
11534	GCAAAACATTCAGGAAGGGTTTGTAAGTGAAGACAAAGTTCTCCAGTTT	A3 F307S 2
11535	GTGATGAGTGTAAACTGGAGAAATTTGTCTTCAAATACAAACCCTT	A3 V311F 1
11536	AAGGGTTTGTATTTGAAGACAAATTTCTCCAGTTTACACTCATCAC	A3 V311F 2
11537	CACCGTCACGGAGTGGCTCTTTCACCCTC	A3 Q349P 1
11538	GAGGGTGAAAGAGCCACTCCGTGACGGTG	A3 Q349P 2
11539	GTGTACTTGTATGACAGGATAATAGTAATACTTTCGCATGGAACCATCAT	A3 H377Y 1
11540	ATGATGGTTCCATGCGAAAGTATTACTATTATCCTGTCATACAAGTACAC	A3 H377Y 2
11541	TGCGAAAGTATTACCACTATACTGTCATACAAGTACACCC	A3 P379T 1
11542	GGGTGTACTTGTATGACAGTATAGTGGTAATACTTTCGCA	A3 P379T 2
11543	CGAAAAGCCTTACCGGCCTCGCCGGCCTGAAAGGAGGGAGT	NTZF F
11544	ACTCCCTCCTTTCAGGCCGGCGAGGCCGGTAAGGCTTTTCG	NTZF R
11545	GCTTCCAACCGAAATGTTTTCTGAGCAATCGTAGCGACAAATGTTTTTTTGTCCGCGTT	CTZF F
11546	AACGCGGACAAAAAAACATTTGTCGCTACGATTGCTCAGAAAACATTTCGGTTGGAAGC	CTZF R
Biomark qPCR primers
Target	Primer name	Sequence
TERT 1 control	11040	GAGCGTGTGACTTCCGAAGG
TERT 1 control	11041	AGGAACTGTCACGGAGTTTGC
A3 ORF (pHD1344 construct)	11128	GAGTGGTTCCTCGTCACTGG
A3 ORF (pHD1344 construct)	11130	TGGCCACACAACCCGGTGTTA
9S control	10664	ATTAGATTGTTTTGTTAATGCTATTAGATG
9S control	10665	ACGGCTGGCATCCATTTC
ND7 edit 3	11410	TCTCGTTTACGTTTGCGTTG
ND7 edit 3	11411	CGGATCCAAAAACAACATCA
ND7 pre	4942	GCGGGCGGAGCATTATT			ND7 pre3 FR?
ND7 pre	4943	GATCTACGGTCCCCTCTTTCCT
ND7 edit	4940	GCATCCCGCAGCACATG			ND7 5 FR ed?
ND7 edit	4941	CTGTACCACGATGCAAATAACCTATAAT
COIII pre	4938	GAAACCAGATGAGATTGTTTGCA
COIII pre	4939	TTCATTCCAACTAAACCCTTTCC
COIII edit	4936	TTGTGTTTTATTACGTTGTATCCAGTATTG
COIII edit	4937	CGAAAGCAAACTCACAACACAAA
CYb pre	4932	ATATAAAAGCGGAGAAAAAAGAAAG
CYb pre	4931	CCCATATATTCTATATAAACAACCTGACA
CYb edit	4930	AAATATGTTTCGTTGTAGATTTTTATTATTT
CYb edit	4931	CCCATATATTCTATATAAACAACCTGACA
A6 (MURF4) pre	4928	TTGCCTTTGCCAAACTTTTAGAAG
A6 (MURF4) pre	4929	ATTCTATAACTCCAAAATCACAACTTTCC
A6 (MURF4) edit	5071	GATTTATTTTGGTTGCGTTTGTTATTATG
A6 (MURF4) edit	5072	CAAACCAACAAACAAATACAAATCAAAC
RPS12 pre	4969	CGACGGAGAGCTTCTTTTGAATA
RPS12 pre	4970	CCCCCCACCCAAATCTTT
RPS12 edit	4967	CGTATGTGATTTTTGTATGGTTGTTG
RPS12 edit	4968	ACACGTCGGTTACCGGAACT
MURF2 pre	4935	GATTTTAAGATTGGCTTTGATTGA
MURF2 pre	4934	AATATAAAATCTAGATCAAACCATCACA
MURF2 edit	4933	GATTTTAATGTTTGGTTGTTTTAATTTAG
MURF2 edit	4934	AATATAAAATCTAGATCAAACCATCACA
ND3 (CR5) pre	4965	GAATGGGAGATGGGTTTTGG
ND3 (CR5) pre	4966	AACAAATCTCTTTACCCCCTTCAG
ND3 (CR5) edit	4963	TGTTTTCGTTGTTGTTTGTGGTT
ND3 (CR5) edit	4964	CAATGTATAAAACACCAAACGTGAATT
COII pre	4944	ATTACAGTGTAACCATGTATTGACATT
COII pre	4946	TTCATTACACCTACCAGGTTCTCT
COII edit	4944	ATTACAGTGTAACCATGTATTGACATT
COII edit	4945	ATTTCATTACACCTACCAGGTATACAA
ND4	5069	CAATCTGACCATTCCATGTGTGA
ND4	5070	TTTCAGCACAATACTTGCTAATAAAACA
COI	5067	CCCGATATGGTATTTCCTCGTATAAA
COI	5068	CCCCCATACCCTCTTCAGTCA
ND8 pre	4953	GATTTTTGCCAACGCATTCAG
ND8 pre	4954	CACCGTGTAATTCTAAATTTCTCACTTC
ND8 edit	6402	AATTTGCCCTAGTTTAGCATTGG
ND8 edit	6403	ATCAATCCGCAAAACGATGA
RT-PCR primers
Target	Name	Sequence
A6	3704	AAAAATAAGTATTTTGATATTATTAAA
A6	3580	TATTATTAACTTATTTGATC
RPS12	3619	CTAATACACTTTTGATAACAAAC
RPS12	3620	AAAAACATATCTTATATCTAAA
MURF2	6204	ATAGAAAGGTATATAATCTATAATG
MURF2	4934	AATATAAAATCTAGATCAAACCATCACA
ND4	3706	TGTGTGACTACCAGAGAT
ND4	3707	ATCCTATACCCGTGTGTA
Library sequencing and PCR primers
Primer name	sequence
5355	GTACGCTGCTCATCTCGAAGCT
5356	TTGGCCACACAACCCGGTGTTA
9571	GCTGCACGCGCCTTCGAGT
10150	GTCAACTCACAGCGACTACA
11512	ACCACTTTGTACAAGAAAGCT
MGA cell line primers
Primer name	Sequence	Description
9530	CGGCGGCCGCATGTCAGGTAAACTTCGTCTTTACAAAG	Forward
9531	ATAGGATCCCTACTTGGTTACTGCCCCTTCCCAG	Reverse
pHd1344-V5-A3 cloning primers
Primer name	Sequence	Description
11547	GGGGACCACTTTGTACAAGAAAGCTTGGGTCTCACACCTTCAACACTGA	A3 N-term R with STOP
11548	GGGGACAAGTTTGTACAAAAAAGCAGGCTCCAAATTGTCGACTTACGCATCA	A3 N-term F attB1
11549	GGGGACCACTTTGTACAAGAAAGCTGGGTCCACCTTCAACACTGACCC	A3 attB no stop
pENTR-Express library construction primers
Primer name	Sequence	Description
11550	ACAAGTTTGTACAAAAAAGCAG	attB1 for error-prone PCR aslo called SM163
11512	ACCACTTTGTACAAGAAAGCT	attB2 for error-prone PCR aslo called SM164
