# Supplementary material
Source: HighWire-hosted journal article supplement (doi:10.1101/rna.079691.123)
Supplement: Supplemental_Table_S3.xlsx [file Supplemental_Table_S3.xlsx]

## Sheet: T-test results summary
T-tests to summarize difference in number of edited sites per clone for L270R, F307S, and P379T compared to exclusively-expressed WT
t-Test: Two-Sample Assuming Equal Variances
Please refer to the second page of the spreadsheet for a list of numbers of sites edited per clone, which reprsents the raw data used for the T-tests.
	ewt	L270R
Mean	30.375	13.2273
Variance	567.696	67.0411
Observations	8	22
Pooled Variance	192.205
Hypothesized Mean Difference	0
df	28
t Stat	2.99585
P(T<=t) one-tail	0.00283768
t Critical one-tail	1.70113
P(T<=t) two-tail	0.00567536
t Critical two-tail	2.04841
t-Test: Two-Sample Assuming Equal Variances
	ewt	F307S
Mean	30.375	42.8
Variance	567.696	613.956
Observations	8	10
Pooled Variance	593.717
Hypothesized Mean Difference	0
df	16
t Stat	-1.07502
P(T<=t) one-tail	0.149156
t Critical one-tail	1.74588
P(T<=t) two-tail	0.298312
t Critical two-tail	2.11991
t-Test: Two-Sample Assuming Equal Variances
	ewt	P379T
Mean	30.375	25.6429
Variance	567.696	508.093
Observations	8	14
Pooled Variance	528.954
Hypothesized Mean Difference	0
df	20
t Stat	0.464244
P(T<=t) one-tail	0.323743
t Critical one-tail	1.72472
P(T<=t) two-tail	0.647487
t Critical two-tail	2.08596

## Sheet: # of sites edited per clone
Number of sites edited per clone.
Excludes clones with a non-U mismatch.
List shows number of sites edited (i.e. any site where the number of Us does not match pre-edited) in each clone per sample.
clone #	eWT	L270R	F307S	P379T
1	0	0	0	0
2	0	1	0	2
3	20	2	32	2
4	29	4	49	11
5	30	6	59	13
6	42	7	54	17
7	63	13	56	21
8	59	13	53	21
9		13	51	21
10		14	74	24
11		14		64
12		16		52
13		13		42
14		13		69
15		15
16		12
17		15
18		17
19		19
20		33
21		22
22		29
