# Supplementary material
Source: HighWire-hosted journal article supplement (doi:10.1101/rna.079691.123)
Supplement: Supplemental_Table_S4.xlsx [file Supplemental_Table_S4.xlsx]

## Sheet:  TbA3_query_mitochondrial_only
Dali structure search with A3 (D6XMN0) Alphafold input query of Alphafold T. brucei structures 9Jan2023:
Gene ID	Z-score	Alphafold	Uniprot ID	Information: listed proteins may localize to the mitochondrion
Tb927.8.620	24	veb8-A	D6XMN0	A3
Tb927.2.2470	14.7	vgbl-A	Q586L9	A1
Tb927.8.680	13.7	msub-A	Q57YG2	A5
Tb927.10.5120	13.4	vfo9-A	Q38B90	A6
Tb927.10.8210	12.6	vey0-A	Q38AE3	A2
Tb927.10.8220	11.1	vj57-A	Q38AE2	Gene is adjacent to A2
Tb927.6.2190	11.1	vhtx-A	Q584T7	MPSS6
Tb927.10.5110	10.6	viq4-A	Q38B91	A4
Tb927.9.4810	10	vh28-A	Q38F66	MPSS5
Tb927.9.13140	7.8	vhgy-A	Q38DA7	Hypothetical Conserved
Tb927.10.1260	7.3	vewq-A	Q38CB4	Aspartyl-tRNA synthetase
Tb927.11.4680	4.3	vdun-A	Q385U9	SURF-1-like protein
Tb927.11.6660	4	vie6-A	Q385A3	kDNA-linked TEX-like protein; 19309510
Tb927.3.1730	4	vg76-A	Q57ZD8	EFP_N domain containing
Tb927.11.16460	3.9	vedb-A	Q381E0	Uncharacterized protein
Tb927.7.3810	3.3	vg6k-A	Q57UC8	mRNA binding 26784394
Tb927.9.11300	3.3	vhin-A	Q38DP8	Mitochondrial ribosomal protein S17
Tb927.11.7900	3.2	vg40-A	Q384M8	KRPB16
Tb927.11.4870	3.1	vf1n-A	Q385T1	binds RBP10
Tb927.6.1680	2.9	vin9-A	Q585P3	KH2F1
Tb927.11.6750	2.5	vint-A	Q384Z5	DNA ligase, putative
Tb927.4.2950	2	vj04-A	Q583X2	mitochondrial DNA polymerase I protein A, putative
Tb927.7.600	2	vho9-A	D6XJX8	mitochondrial DNA ligase homolog, LIG k-beta
