# Supplementary material
Source: HighWire-hosted journal article supplement (doi:10.1101/rna.079691.123)
Supplement: Supplemental_Table_S5.xlsx [file Supplemental_Table_S5.xlsx]

## Sheet: Cognate residues in A3 homologs
A3 residue (Tb927.8.620)	A1 (Tb927.2.2470)	A2 (Tb927.10.8210)	A4 (Tb927.10.5110)	A5 (Tb927.8.680)	A6 (Tb927.10.5120)	MPSS5 (Tb927.9.4810)	MPSS6 (Tb927.6.2190)	Tb927.10.8220
C53	C207	C61	_	_	_	C66	_	_
C56	C210	C64	_	_	_	C69	_	_
L66	L216, L226	L76, L78	_	_	_	L79	_	_
H69	H223	H77	_	_	_	H82	_	_
C183	C499	C411	_	_	_	_	_	_
C186	C502	C414	_	_	_	_	_	_
H199	H537	H427	_	_	_	_	_	_
H204	H542	H432	_	_	_	_	_	_
L270	_	_	_	_	_	_	_	_
V282	V621	_	_	_	_	_	_	_
C288	_	C490	C103	_	_	C176	_	C58
N290	N628	N493	_	N15	N23	_	_	_
F305	F642	_	Y117	F30	F38	H193	H184	W77
F307	_	_	_	_	Y40	H197	_	_
V311	V648	V510	V123	V36	V44	V207	_	V81
Q349	Q717	Q538	Q157, Q164	_	Q85	Q240	_	_
H377	H744	Y569, Y570	Y195	F130	Y114	_	_	Y152
P379	P747	P573	P198	P131	P116	_	P263	_
Location in A3
ZnFs
Adjacent to OB
OB-fold
