# Supplementary material
Source: HighWire-hosted journal article supplement (doi:10.1101/rna.079691.123)
Supplement: Supplemental_Table_S6.xlsx [file Supplemental_Table_S6.xlsx]

## Sheet: A3 crosslinking partners
Cross-linked protein	Lys position in cross-linked protein	Domain in cross-linked protein	Lys position in A3	Domain in A3
KREN1	160	ZF	347	OB	XLs to Endos
KREN2	434	C-terminal	347	OB
KREN2	434	C-terminal	330	OB
KREN2	404	C-terminal	374	OB
KREN2	397	C-terminal	374	OB
KREPB8	74	N-terminal	1	N-terminal
KREPA1	664	OB	392	C-terminal	XLs to A proteins
KREPA1	664	OB	347	OB
KREPA2	135	N-terminal before A2 NTZF	79	NTZF adjacent
KREPA2	263	Between ZFs	87	NTZF adjacent
KREPA2	447	Between A2 CTZF and OB	374	OB
KREPA6	111	OB	374	OB
KREPB5	304	C-terminal	330	OB	Other XLs
KREPB5	40	Between ZF and RIII	374	OB
KREPB5	73	Between ZF and RIII	374	OB
KREPB5	255	C-terminal	374	OB
KREPB5	343	C-terminal	73	NTZF
KREPB5	343	C-terminal	203	CTZF
Simplified table
Lysine in A3	Endonuclease XLs	A protein XLs	Other XLs
1	B8 (74)
73			B5 (343)
79		A2 (135)
87		A2 (263)
203			B5 (343)
330	N2 (434)		B5 (304)
347	N1 (160), N2 (434)	A1 (664)
374	N2 (397 and 404)	A2 (447), A6 (111)	B5 (40, 73, and 255)
392		A1 (664)
