# Supplementary material
Source: HighWire-hosted journal article supplement (doi:10.1101/rna.079691.123)
Supplement: Supplemental_Table_S7.xlsx [file Supplemental_Table_S7.xlsx]

## Sheet: Antibodies
Target	Type	Uses and dilution	Source	Product number
KREPA1	mouse mAb	WB, 1:25	Stuart lab	NA
KREPA2	mouse mAb	WB and BN-PAGE, 1:12.5	Stuart lab	NA
KREPA3	mouse mAb	WB and BN-PAGE, 1:25	Stuart lab	NA
KREL1	mouse mAb	WB, 1:25	Stuart lab	NA
HSP70	mouse mAb	WB, 1:1000	Stuart lab	NA
RESC1	mouse mAb	WB, 1:25	Stuart lab	NA
V5 tag	mouse mAb	WB, 1:20K	Invitrogen	R960-25
